# Supplementary material
Source: Springer Nature journal article supplement (https://www.springermedizin.de/resource/supplementary/12887_2006_149_MOESM2_ESM.pdf/9477368)

**A.**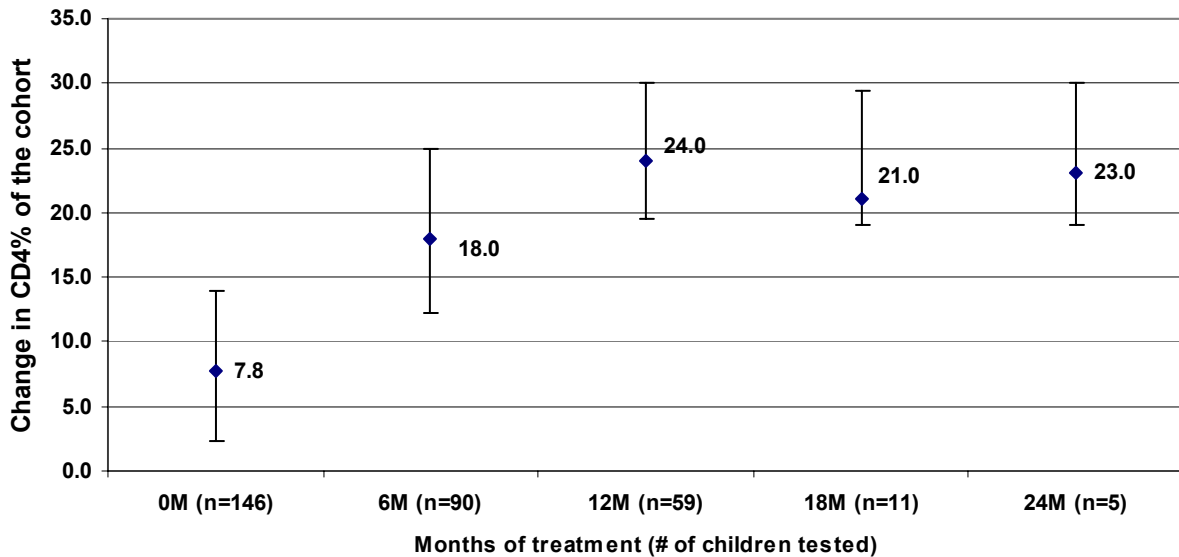**B.**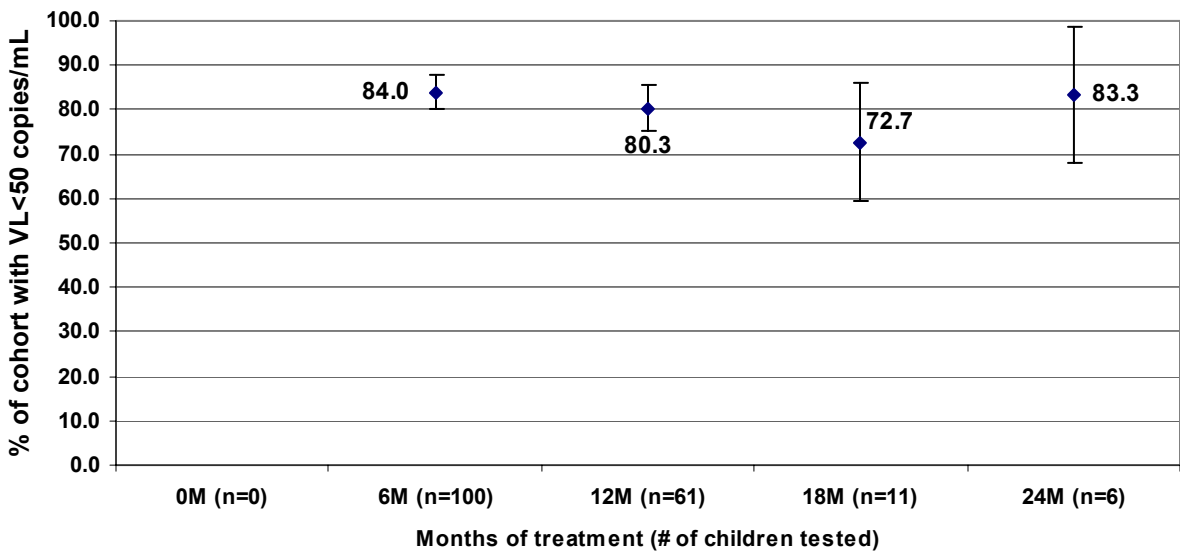

Supplement: MOESM2 [file 9477368]
